# Supplementary material for: C. elegans possess a general program to enter cryptobiosis that allows dauer larvae to survive different kinds of abiotic stress
Source: PubMed Central journal article supplement (PMC7417548; doi:10.1038/s41598-020-70311-8), 2020-08-10
Supplement: 41598_2020_70311_MOESM1_ESM.pdf [file 41598_2020_70311_MOESM1_ESM.pdf]

## Supplementary Information

*C. elegans* possess a general program to enter cryptobiosis that allows dauer larvae to survive different kinds of abiotic stress

Vamshidhar R. Gade<sup>1</sup>, Sofia Traikov<sup>1</sup>, Jana Oertel<sup>2</sup>, Karim Fahmy<sup>2</sup>, Teymuras V. Kurzchalia\*<sup>1</sup>

1. Max Planck Institute of Molecular Cell Biology and Genetics, Dresden, Germany.

2. Institute of Resource Ecology at the Helmholtz-Zentrum Dresden-Rossendorf, Dresden, Germany.

**A**

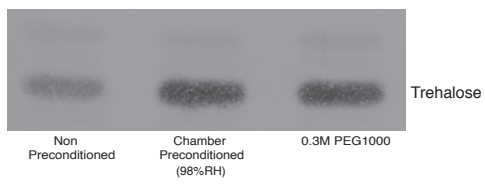

**B**

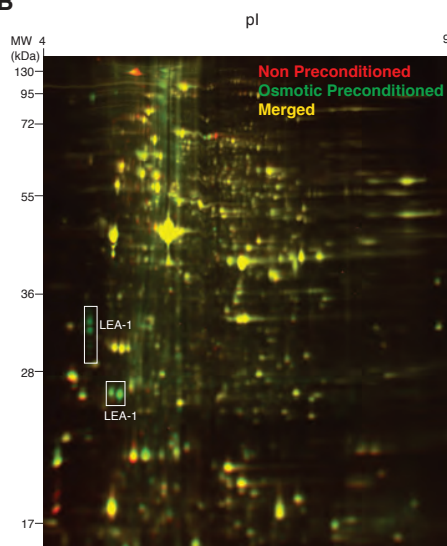

**C**

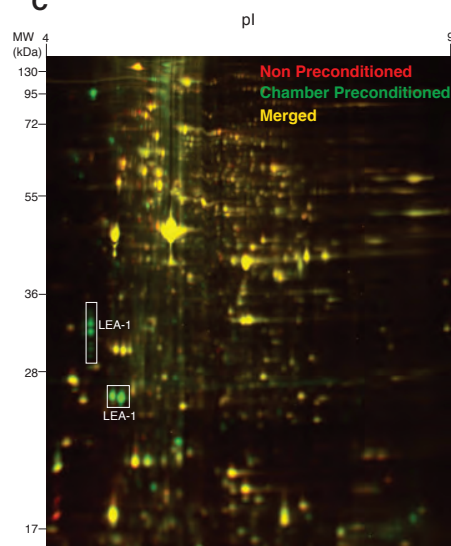

Figure S1

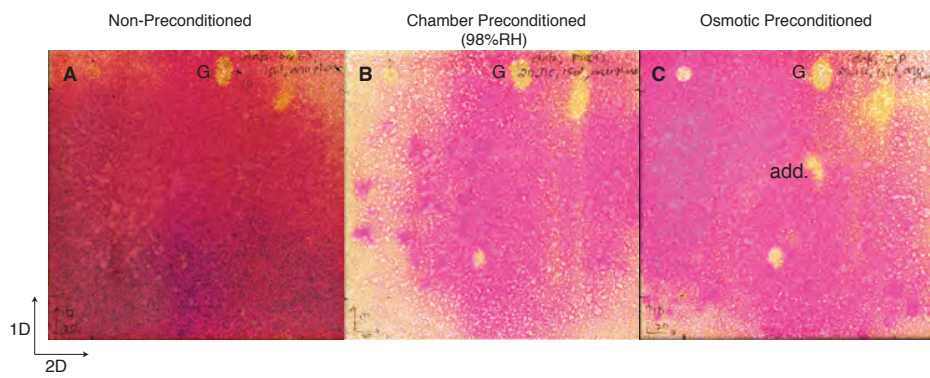

Figure S2

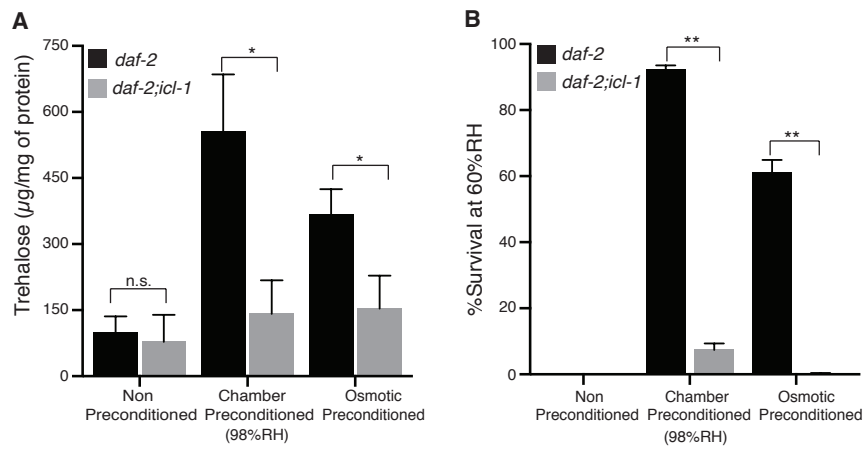

Figure S3

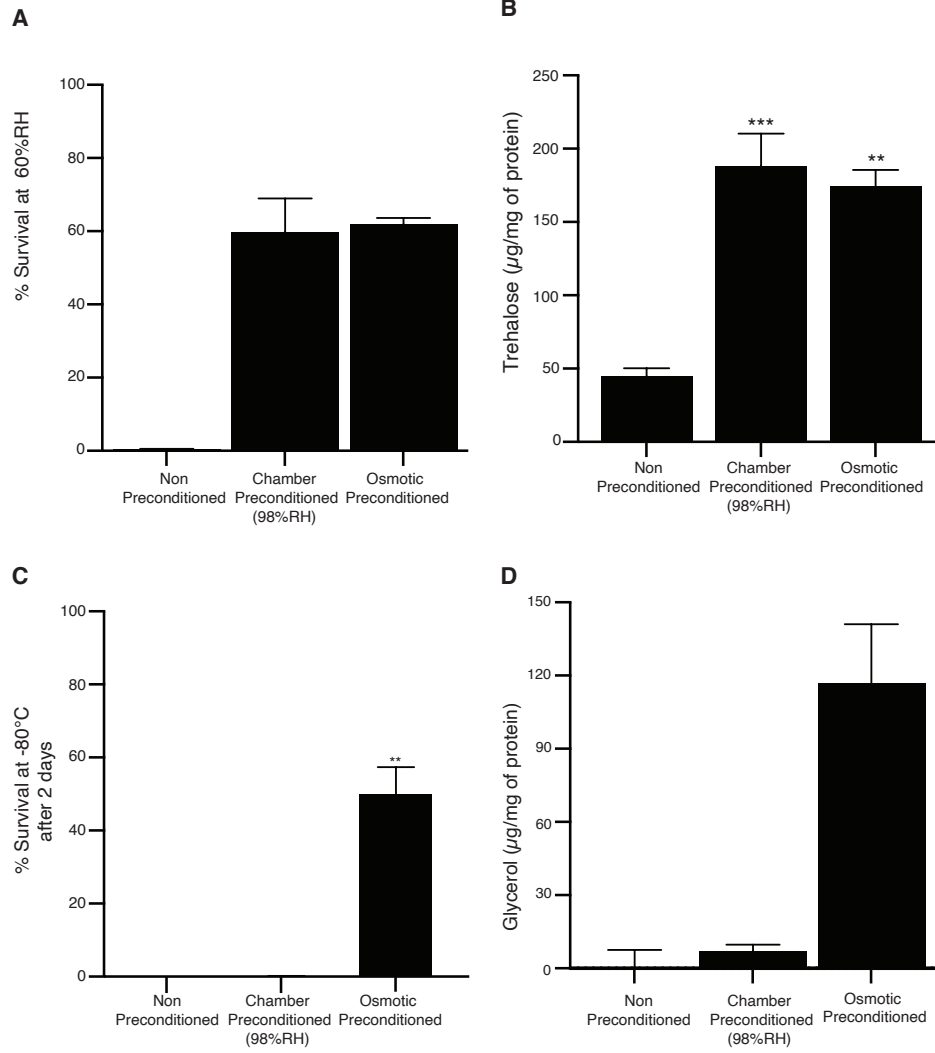

Figure S4
